# Supplementary material
Source: Research Square preprint supplement (doi:10.21203/rs.3.rs-9042970/v1)
Supplement: Supplementary file 3 [file acceb0141a0989a11d65d0e0.docx]

| ID sample | COHORT | Endocrine sensitivity | | PFS | | Disease progression | | OS | | Exitus | miR155-5p (E.V) | | | | miR143-3p (E.V) | | Ratio miR155/ miR143 (E.V) | | | | | Ratio miR155/ miR143 (0/1) | | | | | ER (%) | |
| --- | --- | --- | --- | --- | --- | --- | --- | --- | --- | --- | --- | --- | --- | --- | --- | --- | --- | --- | --- | --- | --- | --- | --- | --- | --- | --- | --- | --- |
| MPC001 | Validation | HR | | 8.27 | | Yes | | 18.00 | | Yes | 6.39 | | | | 5.25 | | 1.22 | | | | | 1 | | | | | 85 | |
| MPC005 | Validation | HS | | 38.37 | | Yes | | 45.73 | | No | 8.70 | | | | 8.07 | | 1.08 | | | | | 1 | | | | | 75 | |
| MPC006 | Validation | HS | | 84.27 | | No | | 44.67 | | No | 1.86 | | | | 2.92 | | 0.64 | | | | | 0 | | | | | 95 | |
| MPC007 | Validation | HS | | 29.57 | | Yes | | 39.73 | | Yes | 1.19 | | | | 11.08 | | 0.11 | | | | | 0 | | | | | 80 | |
| MPC011 | Validation | HS | | 38.87 | | Yes | | 43.50 | | No | 5.90 | | | | 3.28 | | 1.80 | | | | | 1 | | | | | 95 | |
| MPC015 | Validation | HR | | 67.20 | | Yes | | 68.73 | | Yes | 14.81 | | | | 15.11 | | 0.98 | | | | | 0 | | | | | 95 | |
| MPC017 | Discovery | HR | | 7.00 | | Yes | | 30.03 | | No | 1.98 | | | | 1.53 | | 1.29 | | | | | 1 | | | | | 95 | |
| MPC020 | Validation | HS | | 17.97 | | Yes | | 39.90 | | Yes | 13.76 | | | | 4.43 | | 3.10 | | | | | 1 | | | | | 95 | |
| MPC021 | Validation | HS | | 40.07 | | Yes | | 47.03 | | Yes | 6.40 | | | | 15.51 | | 0.41 | | | | | 0 | | | | | 95 | |
| MPC022 | Discovery | HS | | 20.97 | | Yes | | 57.47 | | Yes | 0.77 | | | | 0.87 | | 0.89 | | | | | 0 | | | | | 95 | |
| MPC023 | Discovery | HS | | 4.47 | | Yes | | 15.23 | | Yes | 2.77 | | | | 2.10 | | 1.32 | | | | | 1 | | | | | 65 | |
| MPC024 | Validation | HS | | 38.07 | | Yes | | 40.47 | | Yes | 0.14 | | | | 12.61 | | 0.01 | | | | | 0 | | | | | 85 | |
| MPC025 | Validation | HS | | 78.83 | | Yes | | 80.07 | | No | 16.62 | | | | 9.42 | | 1.76 | | | | | 1 | | | | | 90 | |
| MPC027 | Validation | HR | | 1.30 | | Yes | | 1.80 | | Yes | 13.40 | | | | 54.95 | | 0.24 | | | | | 0 | | | | | 100 | |
| MPC029 | Discovery | HS | | 78.80 | | No | | 39.20 | | No | 1.39 | | | | 4.63 | | 0.30 | | | | | 0 | | | | | 95 | |
| MPC031 | Validation | HS | | 19.60 | | Yes | | 36.20 | | No | 3.60 | | | | 7.91 | | 0.45 | | | | | 0 | | | | | 100 | |
| MPC034 | Validation | HS | | 44.17 | | Yes | | 66.33 | | Yes | 2.54 | | | | 1.68 | | 1.51 | | | | | 1 | | | | | 95 | |
| MPC035 | Discovery | HS | | 75.40 | | No | | 75.40 | | No | 1.32 | | | | 2.20 | | 0.60 | | | | | 0 | | | | | 95 | |
| MPC036 | Validation | HR | | 10.03 | | Yes | | 27.63 | | Yes | 5.30 | | | | 22.51 | | 0.24 | | | | | 0 | | | | | 95 | |
| MPC038 | Validation | HS | | 74.87 | | No | | 74.87 | | No | 3.86 | | | | 6.98 | | 0.55 | | | | | 0 | | | | | 95 | |
| MPC041 | Validation | HS | | 70.23 | | Yes | | 74.93 | | No | 16.59 | | | | 18.44 | | 0.90 | | | | | 0 | | | | | 95 | |
| MPC042 | Discovery | HS | | 31.60 | | Yes | | 60.67 | | Yes | 1.32 | | | | 0.60 | | 2.20 | | | | | 1 | | | | | 15 | |
| MPC043 | Validation | HS | | 47.03 | | Yes | | 74.63 | | No | 3.13 | | | | 6.09 | | 0.51 | | | | | 0 | | | | | 90 | |
| MPC044 | Discovery | HR | | 20.83 | | Yes | | 43.13 | | Yes | 2.22 | | | | 3.95 | | 0.56 | | | | | 0 | | | | | 95 | |
| MPC045 | Validation | HS | | 47.03 | | Yes | | 65.63 | | Yes | 1.14 | | | | 8.28 | | 0.14 | | | | | 0 | | | | | 55 | |
| MPC046 | Validation | HS | | 20.10 | | Yes | | 29.93 | | Yes | 8.73 | | | | 9.04 | | 0.97 | | | | | 0 | | | | | 100 | |
| MPC047 | Discovery | HS | | 20.73 | | Yes | | 71.83 | | No | 2.04 | | | | 2.39 | | 0.85 | | | | | 0 | | | | | 90 | |
| MPC048 | Validation | HR | | 7.00 | | Yes | | 8.87 | | Yes | 21.62 | | | | 9.04 | | 2.39 | | | | | 1 | | | | | 95 | |
| MPC049 | Validation | HS | | 70.43 | | No | | 70.43 | | No | 19.89 | | | | 38.99 | | 0.51 | | | | | 0 | | | | | 100 | |
| MPC051 | Validation | HR | | 18.57 | | Yes | | 32.80 | | Yes | 5.73 | | | | 0.48 | | 11.91 | | | | | 1 | | | | | 85 | |
| MPC052 | Discovery | HS | | 68.43 | | No | | 68.43 | | No | 0.97 | | | | 0.77 | | 1.26 | | | | | 1 | | | | | 95 | |
| MPC053 | Discovery | HS | | 21.83 | | Yes | | 28.47 | | No | 1.47 | | | | 1.15 | | 1.28 | | | | | 1 | | | | | 95 | |
| MPC054 | Validation | HS | | 57.97 | | Yes | | 59.93 | | Yes | 3.52 | | | | 0.85 | | 4.13 | | | | | 1 | | | | | 85 | |
| MPC055 | Validation | HR | | 9.80 | | Yes | | 52.40 | | Yes | 3.38 | | | | 0.96 | | 3.51 | | | | | 1 | | | | | 45 | |
| MPC056 | Discovery | HR | | 48.53 | | Yes | | 67.40 | | No | 1.78 | | | | 1.34 | | 1.33 | | | | | 1 | | | | | NA | |
| MPC057 | Validation | HR | | 66.70 | | No | | 66.70 | | No | 1.94 | | | | 2.23 | | 0.87 | | | | | 0 | | | | | 90 | |
| MPC058 | Discovery | HR | | 6.27 | | Yes | | 56.63 | | Yes | 2.1 | | | | 2.89 | | 0.73 | | | | | 0 | | | | | 100 | |
| MPC059 | Validation | HS | | 16.97 | | Yes | | 20.67 | | Yes | 7.59 | | | | 12.23 | | 0.62 | | | | | 0 | | | | | 95 | |
| MPC060 | Validation | HS | | 33.17 | | Yes | | 66.10 | | No | 1.74 | | | | 0.62 | | 2.78 | | | | | 1 | | | | | 95 | |
| MPC062 | Validation | HR | | 8.13 | | Yes | | 65.77 | | No | 6.55 | | | | 1.96 | | 3.35 | | | | | 1 | | | | | 25 | |
| MPC063 | Validation | HR | | 21.37 | | Yes | | 65.53 | | No | 1.81 | | | | 6.08 | | 0.30 | | | | | 0 | | | | | 95 | |
| MPC064 | Discovery | HR | | 9.00 | | Yes | | 65.50 | | No | 2.16 | | | | 1.64 | | 1.32 | | | | | 1 | | | | | 95 | |
| MPC065 | Discovery | HR | | 33.43 | | Yes | | 54.23 | | Yes | 2.54 | | | | 4.66 | | 0.55 | | | | | 0 | | | | | 95 | |
| MPC067 | Validation | HS | | 14.43 | | Yes | | 63.43 | | No | 3.74 | | | | 1.36 | | 2.75 | | | | | 1 | | | | | 95 | |
| MPC068 | Validation | HR | | 63.43 | | No | | 63.43 | | No | 0.20 | | | | 7.66 | | 0.03 | | | | | 0 | | | | | 90 | |
| MPC069 | Discovery | HS | | 61.53 | | Yes | | 62.97 | | No | 1.3 | | | | 2.59 | | 0.50 | | | | | 0 | | | | | 85 | |
| MPC071 | Discovery | HR | | 23.17 | | No | |  | | No | 2.07 | | | | 1.34 | | 1.54 | | | | | 1 | | | | | 45 | |
| MPC072 | Validation | HS | | 62.47 | | No | | 62.47 | | No | 4.20 | | | | 5.91 | | 0.71 | | | | | 0 | | | | | 90 | |
| MPC074 | Validation | HS | | 3.27 | | Yes | | 17.93 | | Yes | 1.54 | | | | 4.22 | | 0.37 | | | | | 0 | | | | | 75 | |
| MPC076 | Discovery | HR | | 24.50 | | Yes | | 46.63 | | Yes | 2.29 | | | | 2.04 | | 1.12 | | | | | 1 | | | | | 90 | |
| MPC077 | Discovery | HS | | 36.23 | | No | | 36.23 | | No | 1.06 | | | | 1.98 | | 0.54 | | | | | 0 | | | | | 95 | |
| MPC079 | Discovery | HS | | 40.10 | | Yes | | 60.40 | | No | 1.01 | | | | 1.30 | | 0.78 | | | | | 0 | | | | | 100 | |
| MPC080 | Validation | HS | | 30.60 | | Yes | | 52.40 | | Yes | 44.18 | | | | 4.89 | | 9.03 | | | | | 1 | | | | | 10 | |
| MPC081 | Discovery | HS | | 59.97 | | No | | 59.97 | | No | 1.17 | | | | 0.80 | | 1.46 | | | | | 1 | | | | | 80 | |
| MPC082 | Validation | HS | | 14.03 | | Yes | | 68.07 | | Yes | 2.04 | | | | 1.32 | | 1.55 | | | | | 1 | | | | | 75 | |
| MPC083 | Validation | HR | | 3.00 | | Yes | | 3.00 | | Yes | 8.39 | | | | 5.13 | | 1.64 | | | | | 1 | | | | | 95 | |
| MPC084 | Validation | HR | | 3.07 | | Yes | | 6.07 | | Yes | 13.04 | | | | 2.17 | | 6.01 | | | | | 1 | | | | | 95 | |
| MPC086 | Validation | HS | | 25.50 | | No | | 59.00 | | No | 1.07 | | | | 6.49 | | 0.16 | | | | | 0 | | | | | 95 | |
| MPC087 | Discovery | HR | | 57.70 | | No | | 57.70 | | No | 3.35 | | | | 7.60 | | 0.44 | | | | | 0 | | | | | 90 | |
| MPC089 | Validation | HS | | 57.63 | | No | | 57.63 | | No | 4.54 | | | | 2.03 | | 2.23 | | | | | 1 | | | | | 50 | |
| MPC093 | Validation | HS | | 56.70 | | No | | 56.70 | | No | 3.35 | | | | 3.57 | | 0.94 | | | | | 0 | | | | | 95 | |
| MPC095 | Discovery | HR | | 24.43 | | No | | 56.93 | | No | 1.47 | | | | 1.51 | | 0.97 | | | | | 0 | | | | | 95 | |
| MPC099 | Validation | HS | | 51.10 | | Yes | | 54.77 | | No | 7.95 | | | | 13.25 | | 0.60 | | | | | 0 | | | | | 85 | |
| MPC101 | Validation | HR | | 57.40 | | No | | 57.40 | | No | 6.07 | | | | 2.60 | | 2.33 | | | | | 1 | | | | | 95 | |
| MPC102 | Validation | HS | | 25.23 | | Yes | | 57.20 | | No | 7.55 | | | | 25.33 | | 0.30 | | | | | 0 | | | | | 95 | |
| MPC103 | Validation | HS | | 52.93 | | No | | 52.93 | | No | 4.42 | | | | 2.54 | | 1.74 | | | | | 1 | | | | | 95 | |
| MPC104 | Validation | HS | | 23.10 | | Yes | | 50.40 | | Yes | 7.85 | | | | 3.96 | | 1.98 | | | | | 1 | | | | | 90 | |
| MPC105 | Validation | HS | | 46.80 | | Yes | | 49.60 | | Yes | 9.27 | | | | 44.68 | | 0.21 | | | | | 0 | | | | | 85 | |
| MPC106 | Validation | HS | | 22.53 | | Yes | | 29.67 | | Yes | 8.43 | | | | 5.22 | | 1.61 | | | | | 1 | | | | | 95 | |
| MPC109 | Validation | HR | | 5.30 | | Yes | | 7.87 | | Yes | 9.98 | | | | 26.11 | | 0.38 | | | | | 0 | | | | | 100 | |
| MPC111 | Validation | HS | | 47.83 | | No | | 47.83 | | No | 5.82 | | | | 2.25 | | 2.58 | | | | | 1 | | | | | 95 | |
| MPC113 | Validation | HR | | 9.13 | | Yes | | 10.80 | | Yes | 23.38 | | | | 13.11 | | 1.78 | | | | | 1 | | | | | 90 | |
| MPC114 | Validation | HS | | 18.90 | | Yes | | 23.23 | | Yes | 3.96 | | | | 0.81 | | 4.88 | | | | | 1 | | | | | 95 | |
| MPC115 | Validation | HS | | 45.00 | | No | | 45.00 | | No | 15.84 | | | | 141.45 | | 0.11 | | | | | 0 | | | | | NA | |
| MPC118 | Validation | HS | | 43.27 | | No | | 43.27 | | No | 6.56 | | | | 4.04 | | 1.62 | | | | | 1 | | | | | 95 | |
| MPC119 | Validation | HS | | 24.90 | | Yes | | 43.37 | | No | 11.34 | | | | 8.99 | | 1.26 | | | | | 1 | | | | | 50 | |
| MPC122 | Validation | HS | | 35.43 | | Yes | | 41.70 | | No | 20.71 | | | | 70.11 | | 0.30 | | | | | 0 | | | | | 95 | |
| MPC123 | Validation | HS | | 12.20 | | Yes | | 15.20 | | Yes | 1.27 | | | | 0.13 | | 9.57 | | | | | 1 | | | | | 95 | |
| MPC124 | Validation | HS | | 25.93 | | Yes | | 28.93 | | Yes | 7.64 | | | | 13.19 | | 0.58 | | | | | 0 | | | | | 100 | |
| MPC126 | Validation | HS | | 38.97 | | No | | 38.97 | | No | 20.10 | | | | 10.53 | | 1.91 | | | | | 1 | | | | | 95 | |
| MPC127 | Validation | HR | | 4.87 | | Yes | | 32.40 | | Yes | 0.11 | | | | 0.01 | | 7.77 | | | | | 1 | | | | | 15 | |
| MPC128 | Validation | HS | | 38.07 | | No | | 38.07 | | No | 0.05 | | | | 0.43 | | 0.11 | | | | | 0 | | | | | 90 | |
| MPC130 | Validation | HR | | 9.07 | | Yes | | 26.33 | | Yes | 9.15 | | | | 1.02 | | 8.97 | | | | | 1 | | | | | 95 | |
| MPC132 | Validation | HS | | 33.20 | | No | | 33.20 | | No | 2.13 | | | | 7.39 | | 0.29 | | | | | 0 | | | | | 100 | |
| MPC134 | Validation | HS | | 20.03 | | Yes | | 33.13 | | No | 47.54 | | | | 45.86 | | 1.04 | | | | | 1 | | | | | 95 | |
| MPC137 | Validation | HS | | 0.30 | | Yes | | 0.90 | | Yes | 8.30 | | | | 5.26 | | 1.58 | | | | | 1 | | | | | 95 | |
| MPC138 | Validation | HS | | 24.77 | | Yes | | 27.57 | | No | 34.63 | | | | 143.75 | | 0.24 | | | | | 0 | | | | | 90 | |
| MPC140 | Validation | HS | | 24.97 | | No | | 24.97 | | No | 2.37 | | | | 2.78 | | 0.85 | | | | | 0 | | | | | 100 | |
| MPC141 | Validation | HS | | 24.73 | | No | | 24.73 | | No | 0.22 | | | | 41.92 | | 0.01 | | | | | 0 | | | | | 100 | |
| MPC149 | Validation | HS | | 9.37 | | No | | 9.37 | | No | 14.91 | | | | 1.29 | | 11.60 | | | | | 1 | | | | | 90 | |
| MPC150 | Validation | HS | | 48.57 | | No | | 48.57 | | No | 13.05 | | | | 7.13 | | 1.83 | | | | | 1 | | | | | 85 | |
|  |  |  |  | |  | |  | |  | | |  | |  | | | |  | | | | |  | | | | |
| HR = Hormone-resistance | | | | | | | | | | | | |  | | |  | | | |  | | | | | |
| HS = Hormone-sensitive | | | | | | | | | | | | | | | | | | |  | | | | | |  | | | |
| OS = overall survival | | | | | | | | | | | | | | | | | | | | |  | | | | | |
| PFS = progression free survival | | | | | | | | | | | | | | | | | | | | | | | |  | | | | |
